# Supplementary material for: Respiratory management for patients with neuromuscular disorders during the COVID-19 pandemic
Source: PubMed Central journal article supplement — Ther Adv Respir Dis. 2020 Sep 2;14:1753466620953789. doi: 10.1177/1753466620953789 (PMC7798364; doi:10.1177/1753466620953789), 2020-09-02
Supplement: Author_Response_1.pdf [file Author_Response_1.pdf]

## Author Response 1

Response to the Reviewer 1's comments:

Comment: This letter to the editor addresses an important and under-discussed management issue in COVID-19 and focuses on the ventilatory management of patients with COVID-19 in the setting of underlying neuromuscular disease, which has not previously been explored in the literature, even in society-specific guidelines and reviews.

Reply: We appreciate Reviewer 1's valuable comment on our manuscript. We hope our suggestion might help clinicians as well as patients to survive this COVID-19 pandemic crisis.

Response to the Reviewer 2's comments:

Comments to the Author

(1) It's better to add the advantages of your method over the current available methods regarding the prevention of the COVID-19 infection.

(2) What do you think about the comfort of the patient using the proposed devices in a long time?

Reply: We appreciate Reviewer 2's valuable comments on our proposing modified NIV approach and interface. As for your suggestion, we have added the description regarding the potential advantages of the modified NIV delivery (revised manuscript page 5, line 11-13). Besides, -we have added the discussion and its relevant reference (new ref. no. 10) about the consideration of interface selection and adjustment to enhance the comfort of patients especially under a long time use (revised manuscript page 5, line 14-19; page 6, line 1).
