# Supplementary material for: Respiratory management for patients with neuromuscular disorders during the COVID-19 pandemic
Source: PubMed Central journal article supplement — Ther Adv Respir Dis. 2020 Sep 2;14:1753466620953789. doi: 10.1177/1753466620953789 (PMC7798364; doi:10.1177/1753466620953789), 2020-09-02
Supplement: Reviewer_1_v.1.pdf [file Reviewer_1_v.1.pdf]

Reviewer 1 v.1

Comments to the Author

This letter to the editor addresses an important and under-discussed management issue in COVID-19 and focuses on the ventilatory management of patients with COVID-19 in the setting of underlying neuromuscular disease, which has not previously been explored in the literature, even in society-specific guidelines and reviews.
