# Supplementary material for: Respiratory management for patients with neuromuscular disorders during the COVID-19 pandemic
Source: PubMed Central journal article supplement — Ther Adv Respir Dis. 2020 Sep 2;14:1753466620953789. doi: 10.1177/1753466620953789 (PMC7798364; doi:10.1177/1753466620953789), 2020-09-02
Supplement: Reviewer_2_v.1.pdf [file Reviewer_2_v.1.pdf]

Reviewer 2 v.1

Comments to the Author

It is an interesting article. I think it's better to add the advantages of your method over the current available methods regarding the prevention of the COVID-19 infection. What do you think about the comfort of the patient using the proposed devices in a long time?
